# Supplementary material for: The Effect and Cost-Effectiveness of Offering a Combined Lifestyle Intervention for the Prevention of Cardiovascular Disease in Primary Care: Results of the Healthy Heart Stepped-Wedge Trial
Source: MDPI journal article supplement (doi:10.3390/ijerph20065040), 2023-03-13
Supplement: s1 [file s1]

**Supplementary Material File S1. Outcomes, sources and measurements of the Healthy Heart intervention.**

Offering a combined lifestyle intervention for the prevention of cardiovascular disease by general practitioners: the effect and cost-effectiveness of the Healthy Heart stepped-wedge trial

**Table S1. Outcomes, sources and measurements of the Healthy Heart intervention.**

| Outcome                  | Measurement                                               | Source                                                                          | Frequency                 |
|--------------------------|-----------------------------------------------------------|---------------------------------------------------------------------------------|---------------------------|
|                          |                                                           |                                                                                 |                           |
| Baseline characteristics | Age, sex                                                  | Patient-reported or completed with EHR                                          | Baseline                  |
|                          | Origin, educational status, living status, working status | Patient-reported                                                                | Baseline                  |
|                          | PCP and neighborhood                                      | EHR                                                                             | Baseline                  |
|                          | Neighborhood liveability index                            | Leefbarometer 2018(1)                                                           | Baseline                  |
|                          | Comorbidities†                                            | EHR                                                                             |                           |
|                          |                                                           |                                                                                 |                           |
| Determinants             | Goal setting, motivation, confidence                      | Patient-reported                                                                | Baseline                  |
|                          | General Self-Efficacy scale                               | General Self-Efficacy Scale(2)                                                  | Baseline                  |
|                          | Quality of life                                           | EQ-5D-VAS                                                                       | Baseline                  |
| Primary outcomes         |                                                           |                                                                                 |                           |
| Lifestyle changes        | Physical activity                                         | SQUASH (3)                                                                      | Baseline/3/6/12/24 months |
|                          | Diet                                                      | DHD-FFQ, DHD-index (4)                                                          | Baseline/3/6/12/24 months |
|                          | Weight                                                    | Patient-reported, completed with EHR                                            | Baseline/3/6/12/24 months |
|                          | Alcohol consumption                                       | DHD-FFQ in units per day completed with average units per day registered in EHR | Baseline/3/6/12/24 months |
|                          | Smoking status                                            | 7-day + 6 months of abstinence, completed with EHR                              | Baseline/3/6/12/24 months |

|                         |                                                                                                                                                                                            |                                                                                                                                                                                                                          |                                             |
|-------------------------|--------------------------------------------------------------------------------------------------------------------------------------------------------------------------------------------|--------------------------------------------------------------------------------------------------------------------------------------------------------------------------------------------------------------------------|---------------------------------------------|
| Body measurements       | Weight                                                                                                                                                                                     | Patient-reported, completed with EHR                                                                                                                                                                                     | Baseline/3/6/12/24 months                   |
|                         | Systolic blood pressure, LDL-cholesterol, HDL-cholesterol                                                                                                                                  | EHR                                                                                                                                                                                                                      | Baseline/3/6/12/24 months                   |
| Health care utilisation | Number of CVRM related visits to PCP in previous 6 months                                                                                                                                  | Counted as a record in the EHR of an anamnestic (e.g alcohol intake), SBP measurement or laboratory test on separate dates                                                                                               | Baseline/6/12/24 months                     |
| Cost-effectiveness      | EQ-5D-5L(5)<br>EQ-5D VAS score (6)<br>SF-12 US version(7)                                                                                                                                  | Patient-reported                                                                                                                                                                                                         | Baseline/6/12/24 months with 6 month recall |
|                         | Health care utilisation: number of (CVRM-related) contacts with GP, (CVRM) specialist care dietician, physiotherapist, lifestyle coach, hours of (informal) homecare, hospitalization days | Patient-reported, except for CVRM-related contacts are derived from the EHR, as described above                                                                                                                          | Baseline/6/12/24 months with 6 month recall |
|                         | CVRM telephone consultations                                                                                                                                                               | Laboratory measurements were counted as a telephone contact when no visit was registered during 14 days after the laboratory result, assuming the results of the measurement(s) were communicated either by telephone or | Baseline–24 months                          |

|  |                                                     |                                                                                                                                                                                                                                                                                                                                                                                                                     |                    |
|--|-----------------------------------------------------|---------------------------------------------------------------------------------------------------------------------------------------------------------------------------------------------------------------------------------------------------------------------------------------------------------------------------------------------------------------------------------------------------------------------|--------------------|
|  |                                                     | digital information system.                                                                                                                                                                                                                                                                                                                                                                                         |                    |
|  | Medication prescription (number of days prescribed) | Derived from EHR Medication included anti-coagulants (ATC codes B01AC04, clopidogrel B01AC07, dipyridamole B01AC24, ticagrelor B01AC06, acetylsalicylic acid B01AC08, carbasalate calcium B01AA, vitamin K antagonists B01AF, B01AE NOACs diuretics (ATC C03) beta blocking agents (ATC C07) calcium channel blockers (C08) agents acting on the renin-angiotensin system (C09) and lipid lowering medication (C10) | Baseline–24 months |
|  | Laboratory measurements                             | Derived from EHR. Laboratory measurements included; LDL-cholesterol, HDL-cholesterol, triglycerides, eGFR, creatinine, venous glucose, nt-pro-BNP , venous albumin concentration, albumin/creatinine ratio (urine).                                                                                                                                                                                                 | Baseline–24 months |

BMI, body mass index; CVRM, cardiovascular risk management, DHD-FFQ, Dutch Healthy Diet Food Frequency Questionnaire; DHD index, Dutch Healthy Diet index; EHR; routine electronic health record; EQ-5D-5L, 5-level EQ-5D; GP, general practitioner; PCP: primary care practice; QALYs, quality-adjusted life years; SF-12, short form-12; SQUASH, Short Questionnaire to Assess Health-enhancing physical activity

† comorbidities were: hypercholesterolaemia (T93), hypertension (K85, K86, K87); vascular: nephropathy (U99.01), kidney failure according to laboratory measurements (mild-high increased risk on CVD risk/progression/mortality(8)), retinopathy (F83), neuropathy (N94.02), angina pectoris (K74), myocardial infarction (K75), other ischemic diseases (K76) Transient ischemic attack (TIA) (K89), cerebral infarction (K90), peripheral artery disease (K92.01), heart failure (K77); psychiatric: alcohol or drug addiction (P15, P19), dementia (P70), anxiety and psychosis (P72, P74, P79) mood disorders (P03, P73, P76), stress (P01, P02), other (P77, P78, P80, P99, P06, P85), social problems (all ICPC codes within 'Z' group) and other chronic comorbidities, based on its high prevalence in the Dutch population(9).

### Measurement scales of outcomes

Origin: Dutch / Non-Dutch based on country of origin and country of origin of parents.

Educational status: low: no education/ vocational training; high: college or university

Neighborhood liveability index scoring: 1 (very weak) – 9 (excellent). Liveability index was categorised into weak (scores 1-4), satisfactory (5-6) and good–very good (7-9).

Motivation for set goal at baseline: score 0 (low motivation) – 10 (high motivation)

Confidence for set goal at baseline: score 0 (low confidence) – 10 (high confidence)

General Self-Efficacy scale: General Self-Efficacy was scored with a total score of 10 to 40. Higher scores indicate higher perceived general self-efficacy, lower scores indicate lower perceived general self-efficacy.

Quality of life: The EQ-VAS is a visual analogue scale with scores between 100 (best imaginable health) and 0 (worst imaginable health).

Dutch Healthy Diet Index: adherence to Dutch dietary guidelines: total score between 0 (no adherence) and 150 (complete adherence).

Cost prices: Cost prices for health care utilisation were derived from the Dutch reference prices for economic evaluations (8). Costs for professional home care were used as the cost price for out-of-pocket costs for basic home – and informal care.

Medication costs of generic drug were calculated as regular daily doses \* number of days prescribed. Prices from a Dutch official pharmaceutical index were used (9) .

Laboratory costs were calculated with the prices from the Dutch Healthcare Authority (10) .

### References

1. Leefbarometer 2018 [Internet]. Ministerie van Binnenlandse Zaken en Koninkrijksrelaties 2021. Available from: <https://data.overheid.nl/dataset/leefbaarometer-meting-2018#documentation> [downloaded June 2nd 2021].
2. Bosscher RJ, Smit JH. Confirmatory factor analysis of the General Self-Efficacy Scale. *Behaviour research and therapy*. 1998;36(3):339-43.
3. Wendel-Vos GCW, Schuit AJ, Saris WHM, Kromhout D. Reproducibility and relative validity of the short questionnaire to assess health-enhancing physical activity. *Journal of clinical epidemiology*. 2003;56(12):1163-9.
4. van Lee L, Feskens EJ, Meijboom S, Hooft van Huysduynen EJ, van't Veer P, de Vries JH, et al. Evaluation of a screener to assess diet quality in the Netherlands. *The British journal of nutrition*. 2016;115(3):517-26.
5. M. Versteegh M, M. Vermeulen K, M. A. A. Evers S, de Wit GA, Prenger R, A. Stolk E. Dutch Tariff for the Five-Level Version of EQ-5D. *Value in Health*. 2016;19(4):343-52.
6. Stiggelbout AM, Eijkemans MJ, Kiebert GM, Kievit J, Leer JW, De Haes HJ. The 'utility' of the visual analog scale in medical decision making and technology assessment. Is it an alternative to the time trade-off? *Int J Technol Assess Health Care*. 1996;12(2):291-8.
7. Brazier JE, Roberts J. The estimation of a preference-based measure of health from the SF-12. *Med Care*. 2004;42(9):851-9.
8. Nederlands Huisartsen Genootschap DGW, De Leest K, Schenk P, Scherpbier-De Haan N, Tjin-A-Ton J, Tuut M, Van Balen J. NHG-standaard Chronische Nierschade. 2018.
9. van Oostrom SH, Picavet HS, van Gelder BM, Lemmens LC, Hoeymans N, van Dijk CE, et al. Multimorbidity and comorbidity in the Dutch population - data from general practices. *BMC public health*. 2012;12:715.

## **Supplementary Material File S2. Missing data and sensitivity analyses.**

Offering a combined lifestyle intervention for the prevention of cardiovascular disease by general practitioners: the effect and cost-effectiveness of the Healthy Heart stepped-wedge trial

### **Contents**

1. **Table S1.** Descriptives and missing data of outcomes of the control, intervention period and persons with electronic health record data only by time measurement.
2. **Table S2.** Descriptives and missing data of cardiovascular and lifestyle behaviour outcome variables of participants and non-participants of the Healthy Heart program.
3. **Table S3.** Descriptives and missing data of cardiovascular and lifestyle behaviour outcome variables of participants of the Healthy Heart intervention with or without goal for lifestyle change.
4. **Figure S1.** Twenty-four-month trend in cardiovascular risk factor and lifestyle behaviour outcomes of the Healthy Heart intervention: participants with and without goalsetting at baseline.
5. **Table S4.** Sensitivity analysis: cardiovascular and behaviour outcomes of participants of the Healthy Heart program.
6. **Table S5.** Baseline characteristics of participants with electronic health record data only.
7. **Table S6.** Sensitivity analysis: cardiovascular and behaviour outcomes of participants in the intervention period versus participants with electronic health record data only.

**Table S1. Descriptives and missing data of cardiovascular and lifestyle behaviour outcome variables of participants of the Healthy Heart study over all measuring points 0-24 months.**

| <b>Outcome</b>     | <b>Period</b> |                    | <b>Baseline</b>       | <b>3 months</b>      | <b>6 months</b>      | <b>12 months</b>    | <b>24 months</b>    |
|--------------------|---------------|--------------------|-----------------------|----------------------|----------------------|---------------------|---------------------|
| <b>Weight (kg)</b> | Control       | n<br>(missing (%)) | 508<br>3 (0.6%)       | 453<br>58 (11%)      | 430<br>81 (16%)      | 443<br>68 (13%)     | 403<br>108<br>(21%) |
|                    |               | Mean±SD            | 81.4±15.8             | 81.5±14.9            | 81.0±14.5            | 81.2±14.9           | 80.8±14.5           |
|                    | Intervention  | n<br>(missing (%)) | 271.0<br>5 (1.8%)     | 231.0<br>45 (16%)    | 199.0<br>77 (28%)    | 205.0<br>71 (26%)   | 193.0<br>83 (30%)   |
|                    |               | Mean±SD            | 82.8±17.0             | 82.2±17.0            | 80.6±17.1            | 81.3±18.0           | 80.9±17.1           |
|                    | Only EHR      | n<br>(missing (%)) | 142.0<br>13<br>(8.4%) | 27.0<br>128<br>(83%) | 43.0<br>112<br>(72%) | 95.0<br>60<br>(39%) | 80.0<br>75<br>(48%) |
|                    |               | Mean±SD            | 81.8±16.5             | 81.2±18.4            | 84.3±14.9            | 79.9±15.7           | 81.5±13.8           |
| <b>SBP mmHg</b>    | Control       | n<br>(missing (%)) | 417<br>94<br>(18%)    | 113<br>398<br>(78%)  | 191<br>320<br>(63%)  | 289<br>222<br>(43%) | 228<br>283<br>(55%) |
|                    |               | Mean±SD            | 136±15                | 138±16               | 135±13               | 134±13              | 136±13              |
|                    | Intervention  | n<br>(missing (%)) | 212<br>64 (23%)       | 41<br>235<br>(85%)   | 65<br>211(76%)       | 144<br>132<br>(48%) | 99<br>177<br>(64%)  |
|                    |               | Mean±SD            | 136±15                | 135±17               | 137±14               | 134±14              | 136±14              |
|                    | Only EHR      | n<br>(missing (%)) | 147<br>8 (5.2%)       | 28<br>127<br>(82%)   | 44<br>111<br>(72%)   | 99<br>56 (36%)      | 80<br>75 (48%)      |
|                    |               | Mean±SD            | 136±15                | 142±12               | 136±16               | 134±14              | 133±16              |
|                    |               | n                  | 276                   | 84                   | 116                  | 241                 | 201                 |

|                                 |               |                     |                       |                      |                       |                       |                       |
|---------------------------------|---------------|---------------------|-----------------------|----------------------|-----------------------|-----------------------|-----------------------|
| <b>LDL-cholesterol</b>          | Contr ol      | (missin g (%))      | 235<br>(46%)          | 427<br>(84%)         | 395<br>(77%)          | 270<br>(53%)          | 310<br>(61%)          |
|                                 |               | Mean±S D            | 3.3±1.0               | 3.0±0.8              | 3.1±0.9               | 3.1±0.9               | 3.1±1.0               |
|                                 | Interv ention | n<br>(missin g (%)) | 171<br>105<br>(38%)   | 30<br>246<br>(89%)   | 48<br>228<br>(83%)    | 141<br>135<br>(49%)   | 99<br>177<br>(64%)    |
|                                 |               | Mean±S D            | 3.2±0.9               | 3.3±1.1              | 3.2±1.1               | 3.1±0.9               | 3.0±0.8               |
|                                 | Only EHR      | n<br>(missin g (%)) | 117<br>38 (25%)       | 16<br>139<br>(90%)   | 32<br>123<br>(79%)    | 88<br>67 (43%)        | 71<br>84 (54%)        |
|                                 |               | Mean±S D            | 3.2±0.8               | 3.6±0.9              | 3.0±0.9               | 3.0±0.9               | 3.0±0.8               |
| <b>HDL-cholesterol</b>          | Contr ol      | n<br>(missin g (%)) | 275.0<br>236<br>(46%) | 84.0<br>427<br>(84%) | 114.0<br>397<br>(78%) | 242.0<br>269<br>(53%) | 200.0<br>311(61%)     |
|                                 |               | Mean±S D            | 1.5±0.4               | 1.4±0.5              | 1.5±0.4               | 1.5±0.5               | 1.5±0.5               |
|                                 | Interv ention | n<br>(missin g (%)) | 170.0<br>106<br>(38%) | 30.0<br>246<br>(89%) | 47.0<br>229<br>(83%)  | 142.0<br>134<br>(49%) | 101.0<br>175<br>(63%) |
|                                 |               | Mean±S D            | 1.5±0.4               | 1.4±0.4              | 1.4±0.3               | 1.5±0.4               | 1.5±0.4               |
|                                 | Only EHR      | n<br>(missin g (%)) | 117.0<br>38 (25%)     | 16.0<br>139<br>(90%) | 32.0<br>123<br>(79%)  | 90.0<br>65 (42%)      | 74.0<br>81 (52%)      |
|                                 |               | Mean±S D            | 1.5±0.5               | 1.4±0.5              | 1.5±0.5               | 1.5±0.4               | 1.5±0.4               |
| <b>Minutes of weekly physic</b> | Contr ol      | n<br>(missin g (%)) | 477<br>34 (6.7%)      | 429<br>82 (16%)      | 392<br>119<br>(23%)   | 362<br>149<br>(29%)   | 317<br>194<br>(38%)   |
|                                 |               | Mean±S D            | 1997±1138             | 1924±1178            | 1944±1272             | 1922±1157             | 1770±1124             |



|                                                                                       |                  |                        |                   |                     |                     |                     |                     |
|---------------------------------------------------------------------------------------|------------------|------------------------|-------------------|---------------------|---------------------|---------------------|---------------------|
| <b>al<br/>activit<br/>y †</b>                                                         | Interv<br>ention | n<br>(missin<br>g (%)) | 253<br>14 (8.3%)  | 220<br>56 (20%)     | 171<br>105<br>(38%) | 156<br>120<br>(44%) | 155<br>121<br>(44%) |
|                                                                                       |                  | Mean±S<br>D            | 2085±127<br>9     | 1964±129<br>8       | 1982±121<br>8       | 1985±128<br>3       | 1942±123<br>8       |
| <b>DHD<br/>index †</b>                                                                | Contr<br>ol      | n<br>(missin<br>g (%)) | 450<br>61 (12%)   | 396<br>115<br>(23%) | 346<br>165<br>(32%) | 335<br>176<br>(34%) | 293<br>218<br>(43%) |
|                                                                                       |                  | Mean±S<br>D            | 99±18             | 104±18              | 104±18              | 106±18              | 105±18              |
|                                                                                       | Interv<br>ention | n<br>(missin<br>g (%)) | 246<br>30 (11%)   | 207<br>69 (25%)     | 161<br>115<br>(42%) | 148<br>128<br>(46%) | 145<br>131<br>(47%) |
|                                                                                       |                  | Mean±S<br>D            | 100±20            | 105±20              | 106±21              | 107±19              | 108±18              |
| <b>Alcohol<br/>intake<br/>(avera<br/>ge numbe<br/>r of<br/>units<br/>per<br/>day)</b> | Contr<br>ol      | n<br>(missin<br>g (%)) | 500<br>11 (2.2%)  | 445<br>66 (13%)     | 420<br>91 (18%)     | 431<br>80 (16%)     | 390<br>121(24%)     |
|                                                                                       |                  | Median<br>(IQR)        | 0.7 (0.1-<br>1.7) | 0.7 (0.1-<br>1.7)   | 0.6 (0.0-<br>1.4)   | 0.7 (0.0-<br>1.7)   | 0.6 (0.0-<br>1.7)   |
|                                                                                       | Interv<br>ention | n<br>(missin<br>g (%)) | 269<br>7 (2.5%)   | 233<br>43 (16%)     | 192<br>84 (30%)     | 195<br>81 (29%)     | 187<br>89 (32%)     |
|                                                                                       |                  | Median<br>(IQR)        | 0.6 (0.0-<br>1.4) | 0.6 (0.0-<br>1.1)   | 0.7 (0.0-<br>1.4)   | 0.6 (0.0-<br>1.1)   | 0.6 (0.0-<br>1.4)   |
|                                                                                       | EHR<br>only      | n<br>(missin<br>g (%)) | 103<br>52 (34%)   | 12<br>143<br>(92%)  | 30<br>125<br>(81%)  | 79<br>76 (49%)      | 65<br>90 (58%)      |
|                                                                                       |                  | Median<br>(IQR)        | 1.0 (0.0-<br>2.0) | 0.0 (0.0-<br>0.8)   | 1.0 (0.0-<br>1.3)   | 1.0 (0.0-<br>2.0)   | 0.0 (0.0-<br>1.0)   |
| <b>Smoki<br/>ng *<br/>(quit<br/>smoki<br/>ng=yes<br/>)</b>                            | Contr<br>ol      | n<br>(missin<br>g (%)) | 0 (0)             | 6<br>9 (21%)        | 5<br>12 (28%)       | 0<br>15 (35%)       | 7<br>20 (47%)       |
|                                                                                       | Interv<br>ention | n<br>(missin<br>g (%)) | 0 (0)             | 3<br>4 (21%)        | 2<br>9 (47%)        | 3<br>9 (47%)        | 1<br>11 (58%)       |



**Table S2. Descriptives and missing data of cardiovascular and lifestyle behaviour outcome variables of participants and non-participants of the Healthy Heart program over all measuring points 0-24 months.**

| <b>Outcome</b>                             | <b>Period</b>    |                 | <b>Baseline</b> | <b>3 months</b> | <b>6 months</b> | <b>12 months</b> | <b>24 months</b> |
|--------------------------------------------|------------------|-----------------|-----------------|-----------------|-----------------|------------------|------------------|
| <b>Weight (kg)</b>                         | Non-participants | n (missing (%)) | 740 (0.9%)      | 652 (13%)       | 602 (19%)       | 620 (17%)        | 569 (24%)        |
|                                            |                  | Mean±SD         | 81.2±15.6       | 81.1±15.0       | 80.4±14.6       | 80.8±15.5        | 80.3±14.6        |
|                                            | Participants     | n (missing (%)) | 1 (2.5%)        | 8 (20%)         | 13 (33%)        | 12 (30%)         | 13 (33%)         |
|                                            |                  | Mean±SD         | 94.5±22.1       | 94.1±23.0       | 92.7±25.2       | 90.2±23.4        | 92.2±24.6        |
| <b>SBP mmHg</b>                            | Non-participants | n (missing (%)) | 594 (20%)       | 142 (81%)       | 243 (67%)       | 409 (45%)        | 311 (58%)        |
|                                            |                  | Mean±SD         | 136±15          | 137±16          | 135±13          | 134±14           | 136±14           |
|                                            | Participants     | n (missing (%)) | 35 (13%)        | 12 (70%)        | 13 (68%)        | 24 (40%)         | 16 (60%)         |
|                                            |                  | Mean±SD         | 140±16          | 137±15          | 136±14          | 137±18           | 141±17           |
| <b>Minutes of weekly physical activity</b> | Non-participants | n (missing (%)) | 693 (7.2%)      | 618 (17%)       | 541 (28%)       | 500 (33%)        | 451 (40%)        |
|                                            |                  | Mean±SD         | 2064±1229       | 1957±1255       | 1982±1236       | 1976±1245        | 1885±1197        |

|                        |                  |                    |           |           |           |           |           |
|------------------------|------------------|--------------------|-----------|-----------|-----------|-----------|-----------|
|                        | Participants     | n<br>(missing (%)) | 37 (7.5%) | 31 (23%)  | 22 (45%)  | 18 (55%)  | 21 (48%)  |
|                        |                  | Mean±SD            | 1875±1296 | 1827±1341 | 1695±1180 | 1696±1288 | 1907±1364 |
| <b>LDL-cholesterol</b> | Non-participants | n<br>(missing (%)) | 422 (44%) | 107 (86%) | 148 (80%) | 360 (52%) | 288 (61%) |
|                        |                  | Mean±SD            | 3.3±1.0   | 3.0±0.8   | 3.1±0.9   | 3.1±0.9   | 3.1±0.9   |
|                        | Participants     | n<br>(missing (%)) | 25 (38%)  | 7 (83%)   | 16 (60%)  | 22 (45%)  | 12 (70%)  |
|                        |                  | Mean±SD            | 3.2±0.68  | 3.9±1.5   | 3.3±1.2   | 3.2±1.0   | 2.9±1.1   |
| <b>HDL-cholesterol</b> | Non-participants | n<br>(missing (%)) | 420 (44%) | 107 (86%) | 146 (80%) | 362 (52%) | 289 (61%) |
|                        |                  | Mean±SD            | 1.5±0.4   | 1.4±0.4   | 1.5±0.4   | 1.5±0.4   | 1.5±0.4   |
|                        | Participants     | n<br>(missing (%)) | 25 (38%)  | 7 (83%)   | 15 (63%)  | 22 (45%)  | 12 (70%)  |
|                        |                  | Mean±SD            | 1.5±0.4   | 1.4±0.4   | 1.4±0.3   | 1.5±0.4   | 1.5±0.2   |
| <b>DHD index</b>       | Non-participants | n<br>(missing (%)) | 660 (12%) | 573 (23%) | 485 (35%) | 466 (38%) | 416 (44%) |
|                        |                  | Mean±SD            | 99±18     | 104±19    | 104±19    | 106±18    | 106±19    |
|                        | Participants     | n<br>(missing (%)) | 36 (10%)  | 30 (25%)  | 22 (45%)  | 17 (58%)  | 22 (45%)  |

|                                                         |                  |                 |               |               |               |               |               |
|---------------------------------------------------------|------------------|-----------------|---------------|---------------|---------------|---------------|---------------|
|                                                         |                  | Mean±SD         | 96±16         | 111±17        | 111±14        | 109±18        | 111±15        |
| <b>Alcohol intake (average number of units per day)</b> | Non-participants | n (missing (%)) | 730 (2.3%)    | 644 (14%)     | 586 (22%)     | 601 (20%)     | 552 (26%)     |
|                                                         |                  | Median (IQR)    | 0.7 (0.1-1.6) | 0.7 (0.1-1.5) | 0.7 (0.0-1.4) | 0.6 (0.0-1.4) | 0.6 (0.0-1.4) |
|                                                         | Participants     | n (missing (%)) | 39 (2.5%)     | 34 (15%)      | 26 (35%)      | 25 (38%)      | 25 (38%)      |
|                                                         |                  | Median (IQR)    | 0.4 (0.0-0.9) | 0.3 (0.0-0.9) | 0.2 (0.0-1.0) | 0.3 (0.0-1.0) | 0.4 (0.0-1.7) |
| <b>Quit smoking = yes*</b>                              | Participants     | n (missing (%)) | 0 (0)         | 21 (33%)      | 12 (67%)      | 12 (67%)      | 12 (67%)      |
|                                                         | Non-participants | n (missing (%)) | 0 (0)         | 712 (20%)     | 619 (32%)     | 222 (37%)     | 829 (49%)     |
| <b>Number of CVRM related contacts with PCP†</b>        | Participants     | n (missing (%)) | 608 (19%)     | 473 (37%)     | 511 (32%)     | 464 (38%)     | 455 (39%)     |
|                                                         |                  | Median (IQR)    | 1 (1-2)       | 1 (1-2)       | 1 (1-2)       | 1 (1-2)       | 1 (1-2)       |
|                                                         | Non-participants | n (missing (%)) | 37 (7.5%)     | 31 (23%)      | 27 (33%)      | 27 (33%)      | 27 (33%)      |

|                                                                                                    |  |                 |         |         |         |         |         |
|----------------------------------------------------------------------------------------------------|--|-----------------|---------|---------|---------|---------|---------|
|                                                                                                    |  | Median<br>(IQR) | 1 (2-2) | 2 (1-3) | 2 (1-3) | 1 (1-3) | 2 (1-2) |
| * number of current smokers at baseline (n=62), participants HH program n=3, non-participants n=59 |  |                 |         |         |         |         |         |

**Table S3. Descriptives and missing data of cardiovascular and lifestyle behaviour outcome variables of participants of the Healthy Heart intervention with or without goal for lifestyle change over all measuring points 0-24 months.**

| <b>Outcome</b>                             | <b>Group</b> |                 | <b>Baseline</b> | <b>3 months</b> | <b>6 months</b> | <b>12 months</b> | <b>24 months</b> |
|--------------------------------------------|--------------|-----------------|-----------------|-----------------|-----------------|------------------|------------------|
| <b>Weight (kg)</b>                         | With goal    | n (missing (%)) | 455 (0%)        | 398 (13%)       | 358 (21%)       | 367 (19%)        | 330 (27%)        |
|                                            |              | Mean±SD         | 82.9±16.1       | 82.4±15.4       | 83.1±15.3       | 85.9±15.1        | 82.0±15.3        |
|                                            | Without goal | n (missing (%)) | 286 (0%)        | 248 (13%)       | 238 (17%)       | 253 (12%)        | 237 (17%)        |
|                                            |              | Mean±SD         | 73.5±12.4       | 73.7±12.3       | 73.7±12.2       | 73.8±14.1        | 73.5±12.3        |
| <b>Minutes of weekly physical activity</b> | With goal    | n (missing (%)) | 459 (2.1%)      | 382 (7.2%)      | 328 (25%)       | 293 (33%)        | 272 (37%)        |
|                                            |              | Mean±SD         | 2089±1270       | 1980±1277       | 2041±1275       | 2029±1196        | 1923±1238        |
|                                            | Without goal | n (missing (%)) | 268 (1.5%)      | 234 (2.6%)      | 211 (19%)       | 205 (21%)        | 183 (28%)        |
|                                            |              | Mean±SD         | 1997±1168       | 1878±1878       | 1863±1863       | 1867±1867        | 1774±1774        |
| <b>DHD index</b>                           | With goal    | n (missing (%)) | 427 (6.4%)      | 350 (12%)       | 297 (31%)       | 271 (36%)        | 250 (40%)        |
|                                            |              | Mean±SD         | 99±18           | 106±19          | 106±20          | 107±18           | 106±19           |

[illegible]



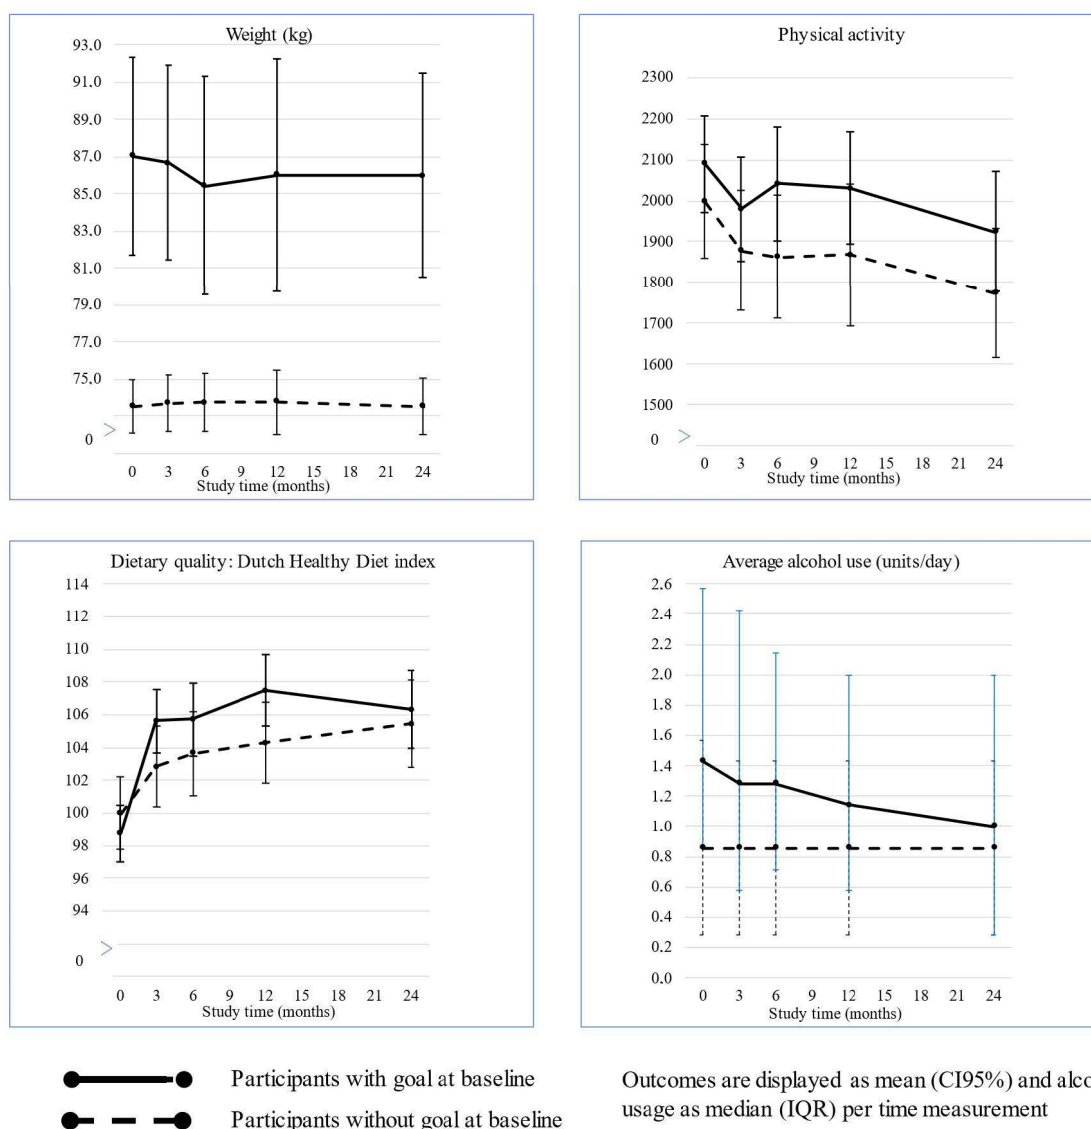

**Figure S1.** Twenty-four-month trend in cardiovascular risk factor and lifestyle behaviour outcomes of the Healthy Heart intervention: participants with and without goalsetting at baseline.

**Table S4. Cardiovascular and lifestyle behaviour outcomes of participants of the Healthy Heart study: difference between participants and non-participants of Healthy Heart program.**

| Outcome                                                       | Baseline mean±SD, median (IQR) or n (%) <sup>a</sup> |                     | Between-group difference: $\beta$ or odds (CI95%) <sup>b</sup> |                             |
|---------------------------------------------------------------|------------------------------------------------------|---------------------|----------------------------------------------------------------|-----------------------------|
|                                                               | Non-participants (n=747)                             | Participants (n=40) | 3-6 months                                                     | 12-24 months                |
| Weight (kg)                                                   | 81.2±15.6                                            | 94.5±22.1           | 0.29 (-0.88-1.46)                                              | -0.41 (-2.23-1.41)          |
| Systolic blood pressure (mmHg)                                | 136±15                                               | 140±16              | -2.68 (-7.61-2.25)                                             | 1.23 (-2.60-5.08)           |
| LDL-cholesterol (mmol/l)                                      | 3.26<br>0.97                                         | 3.21±0.68           | 0.14 (-0.35-0.62)                                              | 0.12 (-0.15-0.39)           |
| HDL-cholesterol                                               | 1.49±0.43                                            | 1.48±0.44           | -0.02 (-0.15-0.10)                                             | <b>-0.09 (-0.17 – 0.01)</b> |
| Minutes of weekly physical activity                           | 2064±<br>1228                                        | 1875±<br>1296       | -43 (-348-263)                                                 | 84 (-308-475)               |
| DHD index                                                     | 99.5±18.3                                            | 95.8±16.3           | <b>8.75 (4.64-12.86)</b>                                       | <b>7.29 (2.34-12.23)</b>    |
| Alcohol intake <sup>c</sup>                                   |                                                      |                     |                                                                |                             |
| No alcohol                                                    | 175 (24%)                                            | 10 (25%)            | <b>0.66 (0.65-0.66)</b>                                        | 0.89 (0.08-9.66)            |
| 0-1                                                           | 291 (39%)                                            | 22 (55%)            |                                                                |                             |
| 1-2                                                           | 149 (20%)                                            | 3 (7.5%)            |                                                                |                             |
| 2 or more                                                     | 115 (16%)                                            | 4 (10%)             |                                                                |                             |
| Quit smoking <sup>d</sup>                                     | 59 (7.9%)                                            | 3 (7.5%)            | n/a                                                            | n/a                         |
| Number of CVRM related contacts with PCP in the past 6 months | 1 (1-2)                                              | 2 (1-2)             | <b>0.38 (0.20-0.55)</b>                                        | <b>1.52 (1.12-2.05)</b>     |
| QALY                                                          |                                                      |                     |                                                                |                             |

<sup>a</sup> percentages are of all participants per period

<sup>b</sup> reference group: non-participants

Models are adjusted for baseline value of outcome

For alcohol intake and number of CVRM visits, between-group differences are displayed in odds ratio (CI95%)

<sup>c</sup> Alcohol: average units per day; percentages are of all participants per period; reference group: no alcohol; models are not adjusted for PCP, due to lack of power

<sup>d</sup> Smoking: numbers of current smoking participants and non-participants of the Healthy Heart program. Due to the small numbers of smoking participants in the program, odds ratios could not be estimated. Number of participants who quit smoking were n (% of total): participants: 2 (66%) (3-6 months) and 0 (0%) (12-24 months) and non-participants: 4 (6.8%) (3-6 months) and 4 (6.8%) (12-24 months).

**Bold** indicates a significant between-group difference  $p < 0.05$

DHD-index: Dutch Healthy Diet index, PCP: primary care practice

**Table S5. Baseline characteristics of included study participants with electronic health record data only.**

| Characteristic                                                                                                                                                                                                                                                                                                                                                                    | Only EHR data<br>(N=155) | Available data (n) |
|-----------------------------------------------------------------------------------------------------------------------------------------------------------------------------------------------------------------------------------------------------------------------------------------------------------------------------------------------------------------------------------|--------------------------|--------------------|
| Age (years)                                                                                                                                                                                                                                                                                                                                                                       | 66.4±9.1                 | 149                |
| Sex (women)                                                                                                                                                                                                                                                                                                                                                                       | 71 (47%)                 | 150                |
| Origin (Dutch)                                                                                                                                                                                                                                                                                                                                                                    | n/a                      | n/a                |
| Educational level (low)                                                                                                                                                                                                                                                                                                                                                           | n/a                      | n/a                |
| Household composition (cohabiting)                                                                                                                                                                                                                                                                                                                                                | n/a                      | n/a                |
| Job status                                                                                                                                                                                                                                                                                                                                                                        |                          |                    |
| Currently employed (< 65 years)                                                                                                                                                                                                                                                                                                                                                   |                          |                    |
| not employed (<65 years)                                                                                                                                                                                                                                                                                                                                                          | n/a                      | n/a                |
| retirement (> 65 years)                                                                                                                                                                                                                                                                                                                                                           |                          |                    |
| Neighbourhood deprivation score                                                                                                                                                                                                                                                                                                                                                   |                          |                    |
| Weak                                                                                                                                                                                                                                                                                                                                                                              | 24 (16%)                 | 155                |
| Satisfactory                                                                                                                                                                                                                                                                                                                                                                      | 23 (15%)                 |                    |
| Good–Extremely good                                                                                                                                                                                                                                                                                                                                                               | 108 (69%)                |                    |
| Comorbidity*                                                                                                                                                                                                                                                                                                                                                                      |                          |                    |
| Chronic comorbidity                                                                                                                                                                                                                                                                                                                                                               | 17 (11%)                 | 155                |
| Hypercholesterolaemia                                                                                                                                                                                                                                                                                                                                                             | 55 (36%)                 |                    |
| Hypertension                                                                                                                                                                                                                                                                                                                                                                      | 132 (85%)                |                    |
| Macrovascular disease                                                                                                                                                                                                                                                                                                                                                             | 6 (3.9%)                 |                    |
| Impaired kidney function                                                                                                                                                                                                                                                                                                                                                          | 30 (19%)                 |                    |
| Medication usage (yes)                                                                                                                                                                                                                                                                                                                                                            |                          |                    |
| Antihypertensive                                                                                                                                                                                                                                                                                                                                                                  | 89 (57%)                 | 155                |
| Lipid lowering                                                                                                                                                                                                                                                                                                                                                                    | 54 (35%)                 |                    |
| Anti coagulants or thrombocyte aggregation inhibitors                                                                                                                                                                                                                                                                                                                             | 11 (7.1%)                |                    |
| Psychiatric medication                                                                                                                                                                                                                                                                                                                                                            | 23 (15%)                 |                    |
| Body mass index (kg/m²)                                                                                                                                                                                                                                                                                                                                                           | 27.5±5.0                 |                    |
| Use of alcohol (yes)                                                                                                                                                                                                                                                                                                                                                              | 83 (66%)                 | 125                |
| Smoking status                                                                                                                                                                                                                                                                                                                                                                    |                          |                    |
| Never                                                                                                                                                                                                                                                                                                                                                                             | 50 (50%)                 | 125                |
| Previous                                                                                                                                                                                                                                                                                                                                                                          | 34 (34%)                 |                    |
| Current                                                                                                                                                                                                                                                                                                                                                                           | 15 (15%)                 |                    |
| General self-efficacy scale (scale 10-40)                                                                                                                                                                                                                                                                                                                                         | n/a                      | n/a                |
| Quality of life (scale 0-100)                                                                                                                                                                                                                                                                                                                                                     |                          |                    |
| Perceived health, EQ-VAS score                                                                                                                                                                                                                                                                                                                                                    | n/a                      | n/a                |
| Adherence to exercise guideline (yes)                                                                                                                                                                                                                                                                                                                                             |                          |                    |
| minutes of physical activity                                                                                                                                                                                                                                                                                                                                                      | n/a                      | n/a                |
| minutes of physical activity + strength and balance                                                                                                                                                                                                                                                                                                                               |                          |                    |
|                                                                                                                                                                                                                                                                                                                                                                                   |                          |                    |
| Continuous values are presented as means ± standard deviation or median (IQR) (interquartile range)                                                                                                                                                                                                                                                                               |                          |                    |
| Categorical values are presented as n (% of participants with non-missing data within group)                                                                                                                                                                                                                                                                                      |                          |                    |
| * Comorbidities were: hypercholesterolaemia (T93), hypertension (K85, K86, K87); vascular: nephropathy (U99.01), kidney failure according to laboratory measurements (mild-high increase risk on CVD risk/progression/mortality(9)), retinopathy (F83), neuropathy (N94.02), angina pectoris (K74), myocardial infarction (K75), other ischemic diseases (K76) Transient ischemic |                          |                    |

---

*attack (TIA) (K89), cerebral infarction (K90), peripheral artery disease (K92.01), heart failure (K77); psychiatric: alcohol or drug addiction ( P15, P19), dementia (P70), anxiety and psychosis (P72, P74, P79) mood disorders (P03, P73,P76), stress (P01, P02), other (P77, P78, P80, P99, P06, P85), social problems (all ICPC codes within ' Z' group) and other chronic comorbidities, based on its high prevalence in the Dutch population(10).*

*VAS: Visual Analogue Scale*

---

**Table S6. Cardiovascular and lifestyle behaviour outcomes of participants of the Healthy Heart study: difference between participants in intervention period and participants with only health record data (EHR-group).**

| Outcome                                                                                                                                                                                                                                                                                                                                                                                                                                                                                                                                                                                                                                                | Baseline mean±SD, median (IQR) or n (%) <sup>a</sup> |                             | Between-group difference: $\beta$ or odds (CI95%) <sup>b</sup> |
|--------------------------------------------------------------------------------------------------------------------------------------------------------------------------------------------------------------------------------------------------------------------------------------------------------------------------------------------------------------------------------------------------------------------------------------------------------------------------------------------------------------------------------------------------------------------------------------------------------------------------------------------------------|------------------------------------------------------|-----------------------------|----------------------------------------------------------------|
|                                                                                                                                                                                                                                                                                                                                                                                                                                                                                                                                                                                                                                                        | Participants with EHR data only (n=155)              | Intervention period (n=276) |                                                                |
| <b>Weight (kg)</b>                                                                                                                                                                                                                                                                                                                                                                                                                                                                                                                                                                                                                                     | 81.8±16.5                                            | 82.8±17.0                   | 1.01 (-0.73-2.76)                                              |
| <b>Systolic blood pressure (mmHg)</b>                                                                                                                                                                                                                                                                                                                                                                                                                                                                                                                                                                                                                  | 136±15                                               | 136±15                      | 2.05 (-0.51-4.61)                                              |
| <b>LDL-cholesterol (mmol/l)</b>                                                                                                                                                                                                                                                                                                                                                                                                                                                                                                                                                                                                                        | 3.2±0.8                                              | 3.2±0.9                     | -0.002 (-0.17-0.17)                                            |
| <b>HDL-cholesterol</b>                                                                                                                                                                                                                                                                                                                                                                                                                                                                                                                                                                                                                                 | 1.5±0.5                                              | 1.5±0.4                     | -0.001 (-0.05-0.05)                                            |
| <b>Number of CVRM related contacts with PCP in the past 6 months</b>                                                                                                                                                                                                                                                                                                                                                                                                                                                                                                                                                                                   | 1 (0-2)                                              | 2 (1-2)                     | 0.94 (0.73-1.20)                                               |
| <sup>a</sup> percentages are of all participants per period<br><sup>b</sup> reference group: Participants with EHR data only<br>Models 3-6 months are adjusted for baseline value of outcome, models 12-24 months are additionally adjusted for age and sex (weight, blood pressure, HDL-cholesterol, alcohol) or lipid lowering medication (LDL-cholesterol)<br>For alcohol intake and number of CVRM visits, between-group differences are displayed in odds ratio (CI95%)<br><b>Bold</b> indicates a significant between-group difference p<0.05<br>EHR: electronic health record, CVRM: cardiovascular risk management, PCP: primary care practice |                                                      |                             |                                                                |

### **Supplementary Material File S3. Economic evaluation.**

Offering a combined lifestyle intervention for the prevention of cardiovascular disease by general practitioners: the effect and cost-effectiveness of the Healthy Heart stepped-wedge trial

#### Contents

**Table S1.** Missing data.

Results of the economic evaluation.

**Table S2.** QALYs.

**Table S3.** Costs control versus intervention period.

**Table S4.** Costs Healthy Heart program.

**Figure S1.** Cost-effectiveness acceptability curves.

**Table S1. Missing data of the cost-effectiveness variables per period of the Healthy Heart trial.**

|                                                             | 6 months prior to<br>baseline |                | 0-6 months after<br>baseline |                | 6-12 months after<br>baseline |                | 12-18 months after<br>baseline |                | 18-24 months<br>after baseline |                |
|-------------------------------------------------------------|-------------------------------|----------------|------------------------------|----------------|-------------------------------|----------------|--------------------------------|----------------|--------------------------------|----------------|
|                                                             | N                             | Missing<br>(%) | N                            | Missing<br>(%) | N                             | Missing<br>(%) | N                              | Missing<br>(%) | N                              | Missing<br>(%) |
| SF12 1<br>General health                                    | 731                           | 55 (7.0%)      | 565                          | 221 (28.1%)    | 521                           | 265 (33.7%)    | 0                              | 786 (100.0%)   | 471                            | 315 (40.1%)    |
| SF12 2<br>Activities /<br>limitations                       | 728                           | 58 (7.4%)      | 562                          | 224 (28.5%)    | 519                           | 267 (34.0%)    | 0                              | 786 (100.0%)   | 467                            | 319 (40.6%)    |
| SF12 3<br>Activities /<br>physical health                   | 723                           | 63 (8.0%)      | 556                          | 230 (28.3%)    | 514                           | 272 (34.6%)    | 0                              | 786 (100.0%)   | 466                            | 320 (40.7%)    |
| SF12 4<br>physical:<br>less<br>accomplished                 | 725                           | 61 (7.8%)      | 559                          | 227 (28.9%)    | 513                           | 273 (34.7%)    | 0                              | 786 (100.0%)   | 452                            | 334 (42.5%)    |
| SF12 4b<br>Physical:<br>Limited in<br>kind of<br>activities | 720                           | 66 (8.4%)      | 553                          | 233 (28.6%)    | 511                           | 275 (35.0%)    | 0                              | 786 (100.0%)   | 464                            | 322 (41.0%)    |
| SF12 5a<br>Mental:<br>accomplished less                     | 730                           | 56 (7.1%)      | 563                          | 223 (28.4%)    | 513                           | 273 (34.7%)    | 0                              | 786 (100.0%)   | 462                            | 324 (41.2%)    |
| SF12 5b<br>Mental: less<br>carefully                        | 725                           | 61 (7.8%)      | 554                          | 232 (28.5%)    | 507                           | 279 (35.5%)    | 0                              | 786 (100.0%)   | 455                            | 331 (42.1%)    |
| SF12 6<br>Pain                                              | 731                           | 55 (7.0%)      | 560                          | 226 (28.8%)    | 520                           | 266 (33.8%)    | 0                              | 786 (100.0%)   | 471                            | 315 (40.1%)    |
| SF12 7a<br>Calm                                             | 730                           | 56 (7.1%)      | 562                          | 224 (28.5%)    | 520                           | 266 (33.8%)    | 0                              | 786 (100.0%)   | 470                            | 316 (40.2%)    |
| SF12 7b<br>Energy                                           | 730                           | 56 (7.1%)      | 562                          | 224 (28.5%)    | 520                           | 266 (33.8%)    | 0                              | 786 (100.0%)   | 471                            | 315 (40.1%)    |
| SF12 7c<br>Down-<br>hearted                                 | 729                           | 57 (7.3%)      | 562                          | 224 (28.5%)    | 519                           | 267 (34.0%)    | 0                              | 786 (100.0%)   | 469                            | 317 (40.3%)    |
| SF12 8<br>Social<br>activities                              | 732                           | 54 (6.9%)      | 563                          | 223 (28.4%)    | 520                           | 266 (33.8%)    | 0                              | 786 (100.0%)   | 471                            | 315 (40.1%)    |
| EQ-5D<br>Mobility                                           | 731                           | 55 (7.0%)      | 564                          | 222 (28.2%)    | 522                           | 264 (33.6%)    | 0                              | 786 (100.0%)   | 474                            | 312 (38.7%)    |
| EQ-5D<br>Selfcare                                           | 727                           | 59 (7.5%)      | 562                          | 224 (28.5%)    | 518                           | 268 (34.1%)    | 0                              | 786 (100.0%)   | 472                            | 314 (38.9%)    |
| EQ-5D                                                       | 730                           | 56 (7.1%)      | 564                          | 222 (28.2%)    | 521                           | 265 (33.7%)    | 0                              | 786 (100.0%)   | 474                            | 312 (38.7%)    |

|                                          |     |             |     |             |     |             |     |              |     |             |
|------------------------------------------|-----|-------------|-----|-------------|-----|-------------|-----|--------------|-----|-------------|
| Daily activities                         |     |             |     |             |     |             |     |              |     |             |
| EQ-5D Pain                               | 731 | 55 (7.0%)   | 563 | 223 (28.4%) | 522 | 264 (33.6%) | 0   | 786 (100.0%) | 473 | 313 (38.8%) |
| EQ-5D Mood                               | 730 | 56 (7.1%)   | 564 | 222 (28.2%) | 521 | 265 (33.7%) | 0   | 786 (100.0%) | 472 | 314 (38.9%) |
| EQ-5D VASSCORE                           | 730 | 56 (7.1%)   | 563 | 223 (28.4%) | 521 | 265 (33.7%) | 0   | 786 (100.0%) | 466 | 320 (40.7%) |
| Selfreported Contacts PCP                | 730 | 56 (7.1%)   | 562 | 224 (28.5%) | 519 | 267 (34.0%) | 0   | 786 (100.0%) | 471 | 315 (40.1%) |
| EHR: Telephone consultations             | 683 | 103 (13.1%) | 683 | 103 (13.1%) | 683 | 103 (13.1%) | 683 | 103 (13.1%)  | 683 | 103 (13.1%) |
| EHR: GP consultations                    | 691 | 95 (12.1%)  | 691 | 95 (12.1%)  | 691 | 95 (12.1%)  | 691 | 95 (12.1%)   | 691 | 95 (12.1%)  |
| EHR: PN consultations                    | 691 | 95 (12.1%)  | 689 | 97 (12.3%)  | 689 | 97 (12.3%)  | 683 | 103 (13.1%)  | 688 | 98 (12.5%)  |
| Lifestyle coach                          | 731 | 55 (7.0%)   | 562 | 224 (28.5%) | 515 | 271 (34.5%) | 0   | 786 (100.0%) | 468 | 318 (40.5%) |
| Other coach                              | 731 | 55 (7.0%)   | 562 | 224 (28.5%) | 515 | 271 (34.5%) | 0   | 786 (100.0%) | 469 | 317 (40.3%) |
| Dietician                                | 731 | 55 (7.0%)   | 565 | 221 (28.1%) | 520 | 266 (33.8%) | 0   | 786 (100.0%) | 471 | 315 (40.1%) |
| Physiotherapist                          | 730 | 56 (7.1%)   | 563 | 223 (28.4%) | 519 | 267 (34.0%) | 0   | 786 (100.0%) | 471 | 315 (40.1%) |
| Specialist consultation                  | 730 | 56 (7.1%)   | 563 | 223 (28.4%) | 520 | 266 (33.8%) | 0   | 786 (100.0%) | 472 | 314 (38.9%) |
| Hospital stay                            | 731 | 55 (7.0%)   | 565 | 221 (28.1%) | 518 | 268 (34.1%) | 0   | 786 (100.0%) | 471 | 315 (40.1%) |
| Home care                                | 731 | 55 (7.0%)   | 565 | 221 (28.1%) | 517 | 269 (34.2%) | 0   | 786 (100.0%) | 471 | 315 (40.1%) |
| Informal care                            | 731 | 55 (7.0%)   | 565 | 221 (28.1%) | 517 | 269 (34.2%) | 0   | 786 (100.0%) | 471 | 315 (40.1%) |
| Laboratory costs                         | 691 | 95 (12.1%)  | 689 | 97 (12.3%)  | 689 | 97 (12.3%)  | 683 | 103 (13.1%)  | 688 | 98 (12.5%)  |
| Medication costs                         | 691 | 95 (12.1%)  | 689 | 97 (12.3%)  | 689 | 97 (12.3%)  | 683 | 103 (13.1%)  | 688 | 98 (12.5%)  |
| Age                                      | 783 | 3 (0.4%)    | 783 | 3 (0.4%)    | 783 | 3 (0.4%)    | 783 | 3 (0.4%)     | 783 | 3 (0.4%)    |
| Sex                                      | 784 | 2 (0.3%)    | 784 | 2 (0.3%)    | 784 | 2 (0.3%)    | 784 | 2 (0.3%)     | 784 | 2 (0.3%)    |
| Postal code                              | 741 | 45 (5.7%)   | 741 | 45 (5.7%)   | 741 | 45 (5.7%)   | 741 | 45 (5.7%)    | 741 | 45 (5.7%)   |
| Baseline systolic blood pressure (mmHg%) | 629 | 157 (20.0%) | 629 | 157 (20.0%) | 629 | 157 (20.0%) | 629 | 157 (20.0%)  | 629 | 157 (20.0%) |



|                                                                                                                                                                                         |     |                |     |                |     |                |     |                |     |                |
|-----------------------------------------------------------------------------------------------------------------------------------------------------------------------------------------|-----|----------------|-----|----------------|-----|----------------|-----|----------------|-----|----------------|
| Baseline<br>LDL-<br>cholesterol<br>(mmol/mol<br>%)                                                                                                                                      | 447 | 339<br>(43.1%) |
| Baseline<br>body mass<br>index<br>(kg/m <sup>2</sup> %)                                                                                                                                 | 778 | 8 (1.0%)       | 778 | 8 (1.0%)       | 778 | 8 (1.0%)       | 778 | 8 (1.0%)       | 778 | 8 (1.0%)       |
| PCP: primary care practice, GP: general practitioner, PN: practice nurse, VAS: visual analogue scale<br>SF-6D: Short-Form-12 questionnaire item<br>EQ-5D: EuroQol 5D questionnaire item |     |                |     |                |     |                |     |                |     |                |

### Missing data imputation procedure

For the cost-effectiveness analysis missing data was imputed using multiple imputation(1) using the procedure of SPSS version 25.0, with the fully conditional specification setting using predictive mean matching for continuous data, and binary logistic and poly-logistic modelling for categorical data, with 10 iterations and the creation of 100 imputed datasets. Predictors in the imputation procedure included inclusion period (control/intervention), sex, age, utilities, medication costs, GP cardiovascular risk management (CVRM) costs, GP other costs and total medical specialist outpatient costs. For rarely used care (n=<30; GP home visits, non-CVRM related hospitalisation, hospital number), predictors were inclusion period, sex, age and utilities; for very rarely used care (n<15; CVRM related hospitalisation, hospital type, lifestyle coaching, home care), only inclusion period. Informal home care at 24 months was imputed based on only baseline informal home care as it was extremely rare (<5).

1. Faria R, Gomes M, Epstein D, White IR. A Guide to Handling Missing Data in Cost-Effectiveness Analysis Conducted Within Randomised Controlled Trials. *Pharmacoeconomics*. 2014;32(12):1157-70.

## Results of the economic evaluation

Participants' utilities at baseline were comparable between the control and intervention period (adjusted mean difference (95% CI) -0.004 (-0.04;0.03)) (Table 1, main paper). First-year QALYs were significantly lower in the participants in the intervention group (mean difference (95% CI) -0.06 (-0.11;-0.02)), while in the second year the difference was non-significant (Supplementary Material (SM) Table S2,). Also for the total study period, QALYs were lower in participants during the intervention period, but the association did not reach significance (intervention:  $1.38 \pm 0.88$ , control:  $1.49 \pm 0.79$ , adjusted difference (95%CI) -0.10 (-0.20;0.002)). QALYs based on the SF-6D questionnaire and EQ-VAS showed similar results (Figure 3 and SM C).

## Costs

Baseline costs were comparable between the periods (adjusted mean difference (CI95%) -18 (-247;212)  $p=0.881$ ) (Table 1, main paper). With 15% of the patients participating in the Healthy Heart program, average intervention costs were estimated at EUR 91 per patient in the intervention period (CI95% 70-108) (SM C, Table S4). Mean costs of 2-year total CVRM care were comparable (mean $\pm$ SD intervention: mean adjusted difference (CI95%) EUR 106 (-80; 293)  $p=0.266$ ). Mean 2-year total health care costs were mean $\pm$ SD EUR 2909 $\pm$ 4826 (intervention) and EUR 2457 $\pm$ 3494 (control), with no significant difference between the periods (mean adjusted difference (CI95%) EUR 484 (-110;1079)  $p=0.110$ ) (SM C, Table S3).

Combining the difference in QALYs and costs, the probability that offering the Healthy Heart program in general practices is cost-effective compared to not offering the program was below 6%, regardless of the willingness-to-pay per QALY (SM C, Figure S1A). In the sensitivity analyses using the SF-6D and EQ-VAS to calculate QALYs, this probability remained below 7% (SF-6D) and 26% (EQ-VAS). In the sensitivity analysis using the willingness-to-pay for cardiovascular risk management care costs, this probability remained below 14% (EQ-5D and SF-12) and 35% (EQ-VAS) (SM C, Figure S1B).

**Table S2. QALYs for the intervention and the control period.**

|                                                                                                                                                                                                             | Period               |                 | Mean adjusted difference (95% CI) | p-value |
|-------------------------------------------------------------------------------------------------------------------------------------------------------------------------------------------------------------|----------------------|-----------------|-----------------------------------|---------|
| QALY                                                                                                                                                                                                        | Intervention (n=275) | Control (n=511) | Reference: control period         |         |
| <b>Baseline utility</b>                                                                                                                                                                                     |                      |                 |                                   |         |
| EQ-5D-5L                                                                                                                                                                                                    | 0.85±0.28            | 0.85±0.32       | -0.004 (-0.04;0.03)               | 0.836   |
| SF-6D                                                                                                                                                                                                       | 0.80±0.13            | 0.81±0.14       | -0.01 (-0.03;0.01)                | 0.408   |
| VAS                                                                                                                                                                                                         | 0.90±0.12            | 0.91±0.11       | -0.01 (-0.03;0.01)                | 0.171   |
| <b>0-12 months QALYs</b>                                                                                                                                                                                    |                      |                 |                                   |         |
| EQ-5D-5L                                                                                                                                                                                                    | 0.70±0.46            | 0.77±0.38       | <b>-0.06 (-0.11;-0.02)</b>        | 0.006   |
| SF-6D                                                                                                                                                                                                       | 0.76±0.19            | 0.79±0.17       | -0.02 (-0.04;-0.001)              | 0.067   |
| VAS                                                                                                                                                                                                         | 0.91±0.10            | 0.92±0.09       | -0.002 (-0.01;0.002)              | 0.724   |
| <b>12-24 months QALYs</b>                                                                                                                                                                                   |                      |                 |                                   |         |
| EQ-5D-5L                                                                                                                                                                                                    | 0.68±0.59            | 0.72±0.56       | -0.04 (-0.11;0.04)                | 0.364   |
| SF-6D                                                                                                                                                                                                       | 0.74±0.29            | 0.76±0.33       | -0.01 (-0.04;0.01)                | 0.314   |
| VAS                                                                                                                                                                                                         | 0.91±0.10            | 0.92±0.10       | -0.001 (-0.02;0.01)               | 0.837   |
| <b>0-24 months QALYs</b>                                                                                                                                                                                    |                      |                 |                                   |         |
| EQ-5D-5L                                                                                                                                                                                                    | 1.38±0.88            | 1.49±0.79       | -0.10 (-0.20;0.002)               | 0.55    |
| SF-6D                                                                                                                                                                                                       | 1.50±0.41            | 1.55±0.43       | -0.03 (-0.07;0.008)               | 0.116   |
| VAS                                                                                                                                                                                                         | 1.82±0.19            | 1.84±0.17       | -0.004 (-0.03;0.02)               | 0.753   |
| <p>Comparisons are adjusted for sex, age, baseline utility and baseline total healthcare costs</p> <p>Outcomes are pooled results of 100 imputed datasets</p> <p><b>Bold indicates p-value &lt;0.05</b></p> |                      |                 |                                   |         |



**Table S4. Costs of the Healthy Heart program per participant.**

|                                                                                                                          | Units | Unit price | Total costs |
|--------------------------------------------------------------------------------------------------------------------------|-------|------------|-------------|
| Personnel                                                                                                                |       |            |             |
| Intake                                                                                                                   | 1     | €58.00     | € 58.00     |
| Group sessions                                                                                                           | 7     | €14.50     | € 126.88    |
| Individual in-depth consult                                                                                              | 1     | €58.00     | € 58.00     |
| Return meeting                                                                                                           | 1     | €18.13     | € 18.13     |
|                                                                                                                          |       |            |             |
| Individual evaluation meeting                                                                                            | 1     | €58.00     | € 58.00     |
| TOTAL per participant                                                                                                    |       |            | € 319.00    |
| TOTAL per participant including taxes                                                                                    |       |            | € 385.99    |
| Room rental rate/ hour*                                                                                                  |       |            |             |
| Intake                                                                                                                   | 1     | €7.52      | € 7.52      |
| Group sessions                                                                                                           | 7     | €1.88      | € 13.16     |
| Individual in-depth consult                                                                                              | 1     | €7.52      | € 7.52      |
| Return meeting                                                                                                           | 1     | €1.88      | € 1.88      |
| Individual evaluation meeting                                                                                            | 1     | €7.52      | €7.52       |
| Coffee and tea                                                                                                           | 11    | €1.00      | €11.00      |
| TOTAL per participant                                                                                                    |       |            | € 48.60     |
|                                                                                                                          |       |            |             |
|                                                                                                                          |       |            |             |
| TOTAL per participant including taxes                                                                                    |       |            | € 434.59    |
| Costs given 8 participants per group.<br>Rate lifestyle coach (per hour) € 58.00<br>*mean costs of 2 different locations |       |            |             |

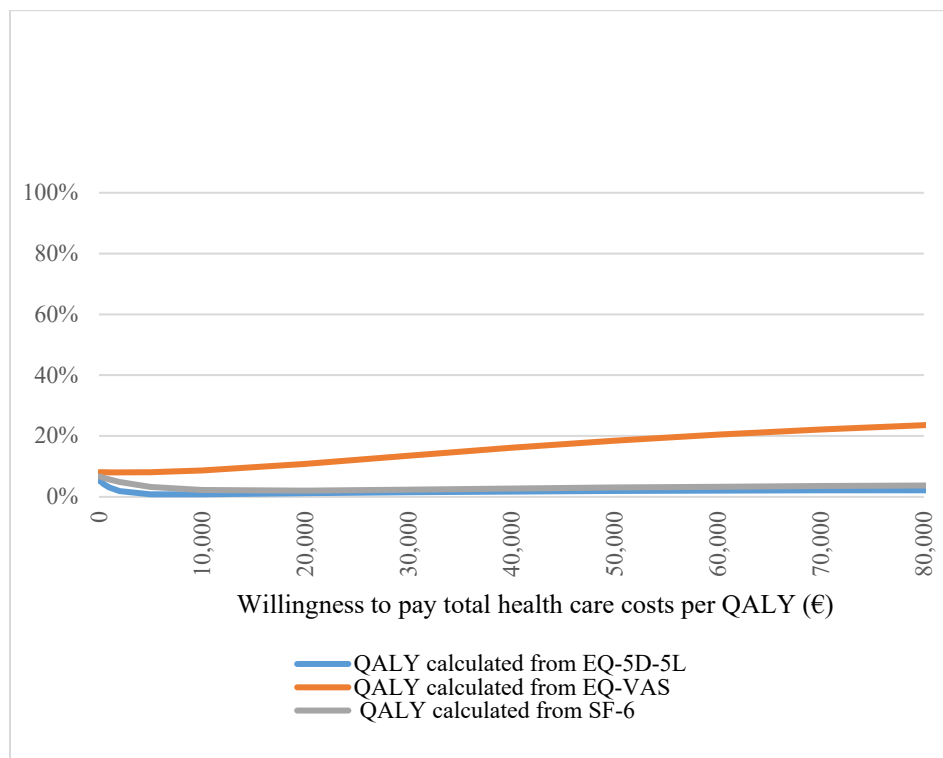

**Figure S1. Cost-effectiveness acceptability curve.**

The probability (%) that offering the Healthy Heart program is cost effective in a high cardiovascular risk population versus not offering the program, depending on willingness-to-pay for **total health care**.

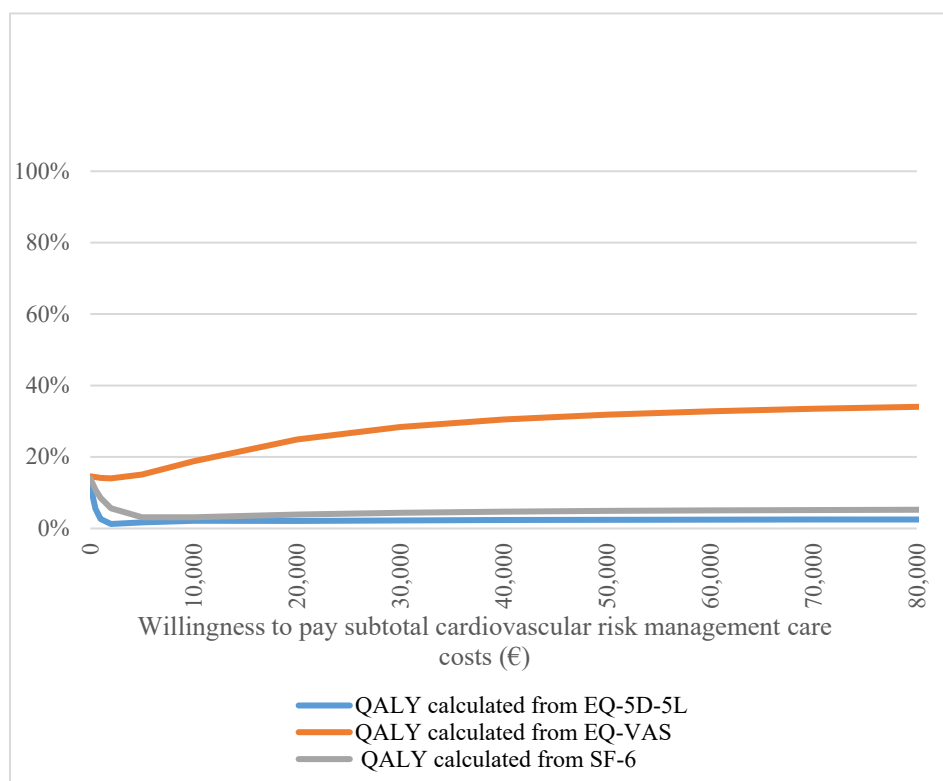

**Figure S2. Cost-effectiveness acceptability curve.**

The probability (%) that offering the Healthy Heart program is cost effective in a high cardiovascular risk population versus not offering the program, depending on willingness-to-pay for **cardiovascular ris**.
